# Supplementary material for: Synthesis of green fluorescent carbon dots and their application in mercury ion detection
Source: Royal Society of Chemistry journal article supplement (doi:10.1039/d4ra06635a), 2024-01-01
Supplement: d4ra06635a1.pdf [file d4ra06635a1.pdf]

**Supporting information for**  
**Synthesis of green fluorescent carbon dots and their application in**  
**mercury ion detection**

Juan Hou<sup>a,\*</sup>, Qinqin Chen<sup>b</sup>, Xiangzhi Meng<sup>a</sup>, Huiling Liu<sup>b</sup>, Wei Feng<sup>b,\*</sup>

<sup>a</sup> School of Chemistry and Environmental Engineering, Jilin Provincial Science and Technology Innovation Center of Optical Materials and Chemistry, Jilin Provincial International Joint Research Center of Photo-functional Materials and Chemistry, Changchun University of Science and Technology, Changchun 130022, China

<sup>b</sup> Department of Chemistry, Chemical Engineering and Resource Utilization, Northeast Forestry University, 26 Hexing Road, Harbin 150040, PR China

\*Corresponding author

E-mail: houjuan0503@126.com; wfeng@nefu.edu.cn

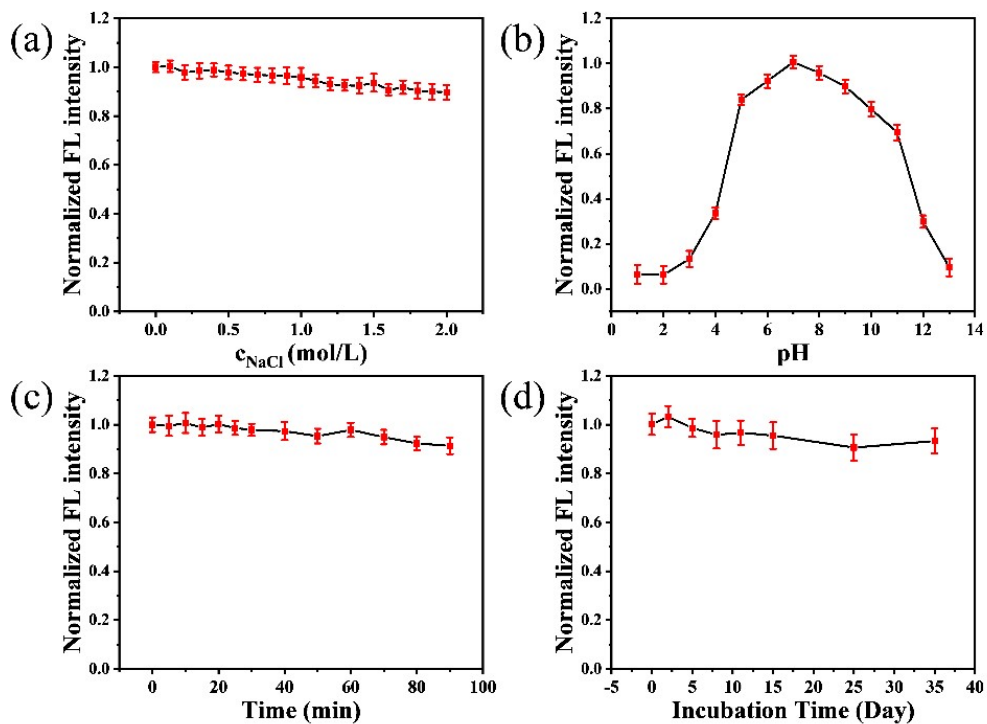

**Fig. S1** The effects of GCDs at (a) different concentrations of NaCl, (b) different pH values, (c) continuous irradiation of 365 nm with a UV lamp, (d) different storage time

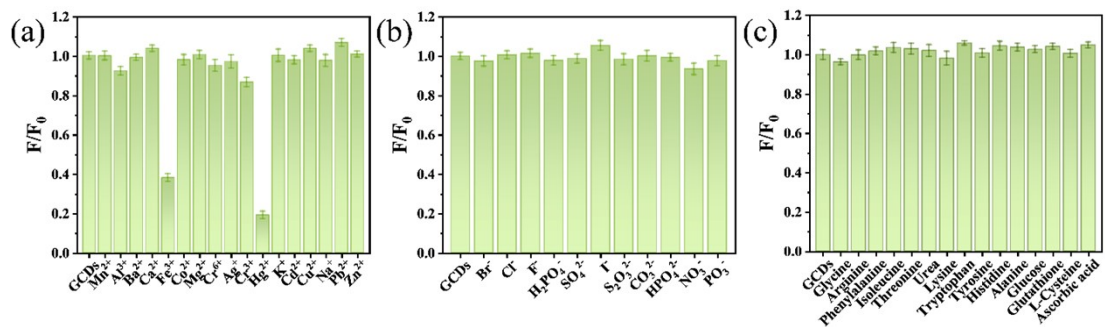

**Fig. S2** Selectivity experiments of the GCDs on metal ions (a), anions (b) and small molecules (c)

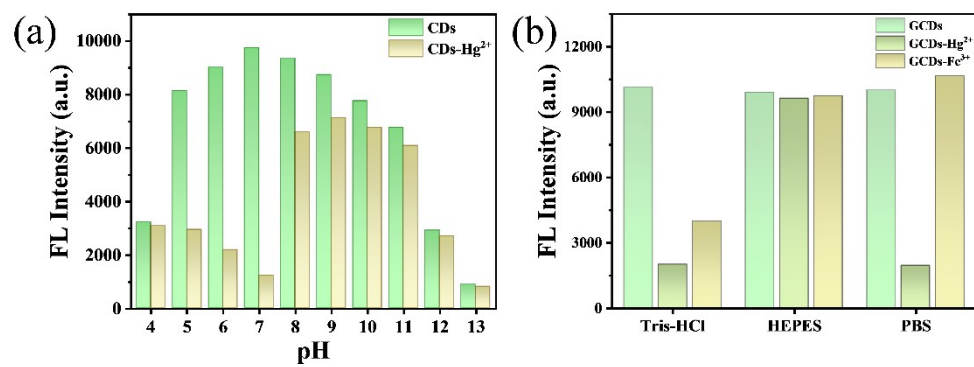

**Fig. S3** The effects of (a) different pH, (b) different buffer solutions on the detection of Hg<sup>2+</sup> by GCDs

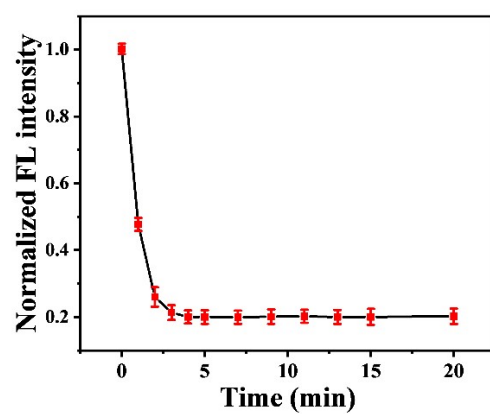

Fig. S4 The effects of incubation time on GCDs detection of  $\text{Hg}^{2+}$

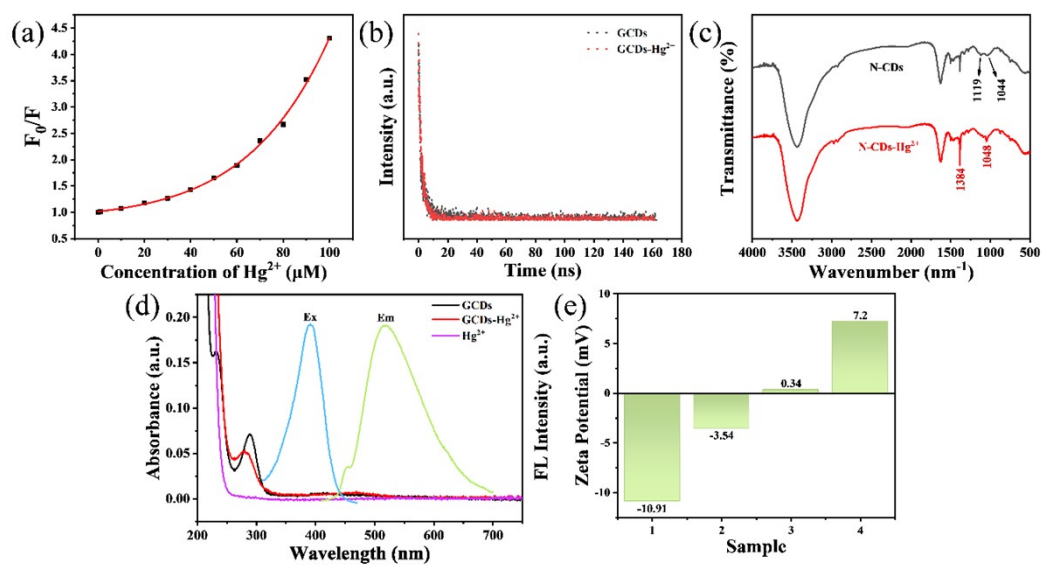

**Fig. S5** (a) Stern-Volmer plot of the GCDs after the addition of  $\text{Hg}^{2+}$ , (b) the fluorescence lifetime of GCDs, (c) FT-IR spectra of GCDs and GCDs added with  $\text{Hg}^{2+}$ , (d) UV absorption spectrum of GCDs and GCDs added with  $\text{Hg}^{2+}$ , (e) Zeta potential of 4 samples that the GCDs solution of adding 0, 20, 50, 80  $\mu\text{M}$   $\text{Hg}^{2+}$ , respectively
